# Supplementary material for: An Increase in Prominent Probiotics Represents the Major Change in the Gut Microbiota in Morbidly Obese Female Patients upon Bariatric Surgery
Source: MDPI journal article supplement (doi:10.3390/women4010007), 2024-03-18
Supplement: s1 [file s1]

## Supplementary Information

|                                                                     |                                                                                   |                                                                                   |                                                                                   |                                                                                    |                                                                                     |
|---------------------------------------------------------------------|-----------------------------------------------------------------------------------|-----------------------------------------------------------------------------------|-----------------------------------------------------------------------------------|------------------------------------------------------------------------------------|-------------------------------------------------------------------------------------|
| $\text{BMI} = \frac{\text{mass [kg]}}{\text{height}^2 \text{ [m]}}$ |  |  |  |  |  |
| <b>BMI</b>                                                          | < 18.5                                                                            | 18.5 – 24.9                                                                       | 25 – 29.9                                                                         | 30 – 39.9                                                                          | 40 <                                                                                |
| <b>Classification</b>                                               | Underweight                                                                       | Normal weight                                                                     | Overweight                                                                        | Moderate obesity                                                                   | Morbid obesity                                                                      |

**Figure S1.** Classification of normal body weight and different stages of obesity by BMI-scale. The BMI is generally calculated according to the formula given in the “BMI”-field on the left.

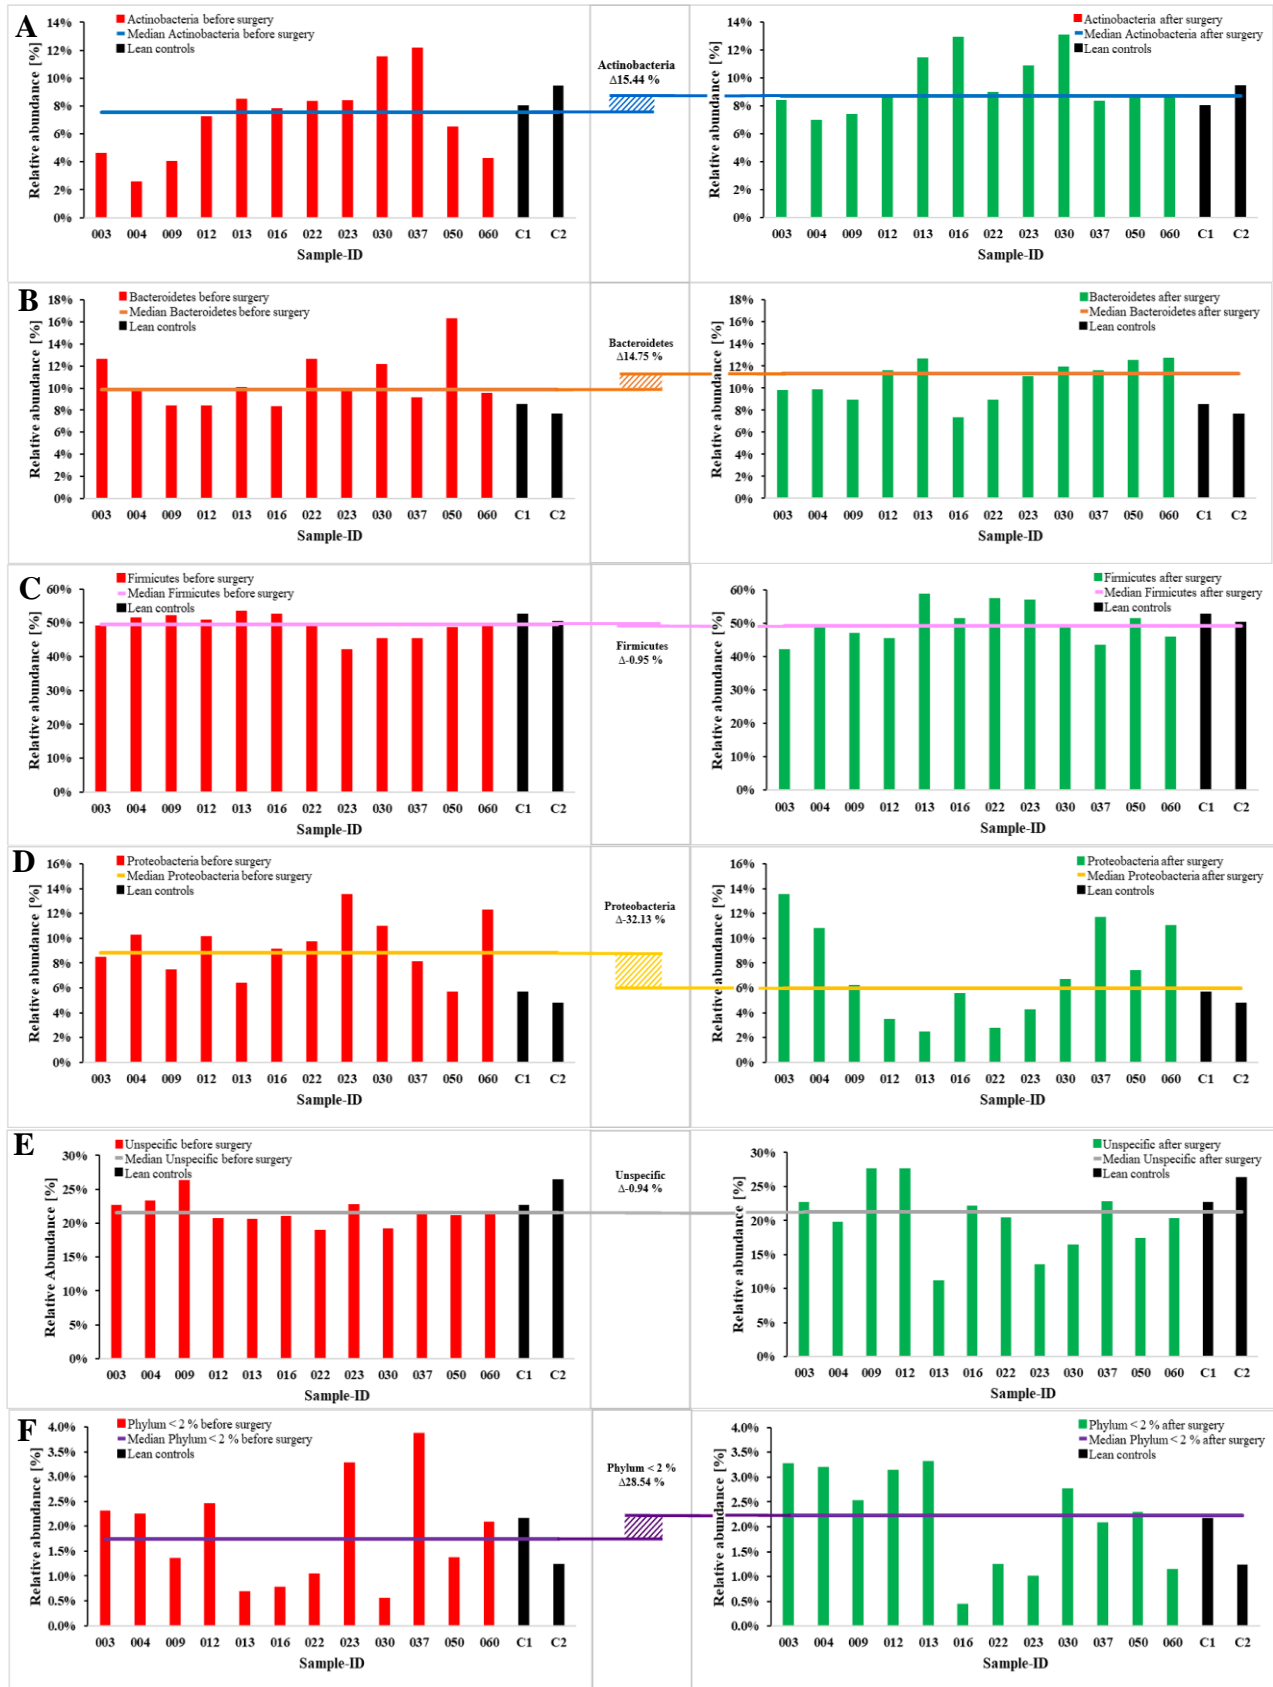

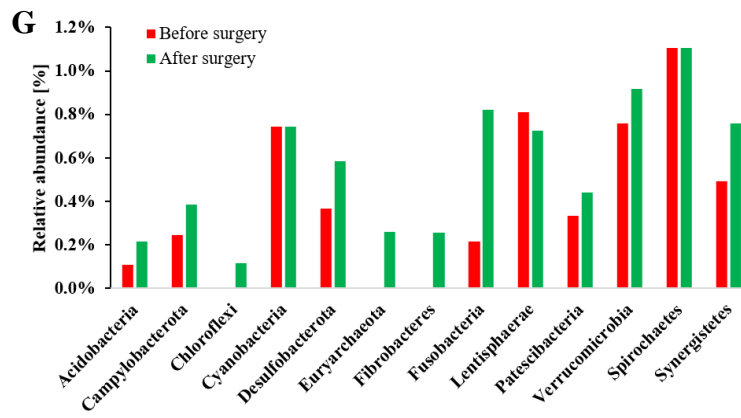

**Figure S2.** Relative abundance [%] of the identified major phyla of the gut microbiome, their respective medians and the respective percentage delta. Data from patients (P-ID 003-060) before and after bariatric surgery, as well as controls (C1, C2), are displayed. (A) *Actinobacteria*, (B) *Bacteroidetes*, (C) *Firmicutes*, (D) *Proteobacteria*, (E) “Unspecific”, (F) “Phylum < 2 %”. (G) Mean relative abundance [%] of the individual phyla summarized as “Phylum < 2 %”.
